# Supplementary material for: MoS2 nanodot decorated In2S3 nanoplates: a novel heterojunction with enhanced photoelectrochemical performance
Source: Royal Society of Chemistry journal article supplement (doi:10.1039/c5cc09601d), 2015-11-30
Supplement: c5cc09601d1.pdf [file c5cc09601d1.pdf]

*Electronic Supplementary Information (ESI)*

**MoS<sub>2</sub> nanodots decorated In<sub>2</sub>S<sub>3</sub> nanoplates: a novel  
heterojunction with enhanced photoelectrochemical  
performance**

**Fangyang Liu,<sup>a,b</sup> Yan Jiang<sup>a</sup>, Jia Yang<sup>a</sup>, Mengmeng Hao<sup>a</sup>, Zhengfu Tong<sup>a</sup>, Liangxing  
Jiang<sup>a</sup> and Zhuangzhi Wu<sup>c\*</sup>**

<sup>a</sup>School of Metallurgical Science and Engineering, Central South University, Changsha,  
410083, China.

<sup>b</sup>School of Photovoltaic and Renewable Energy Engineering, University of New South Wales,  
Sydney, NSW 2052, Australia.

<sup>c</sup>School of Material Science and Engineering, Central South University, Changsha 410083  
(China).

\*Corresponding author. E-mail: zwu2012@csu.edu.cn;

## **Experimental Details**

### **Synthesis of In<sub>2</sub>S<sub>3</sub> nanoplates:**

110.6 mg InCl<sub>3</sub> (99.9%, Aladdin), 24 mg S (AR, Sinopharm Chemical Reagent), and 10 mL oleylamine (C-18 content 80%-90%, Aladdin) were added into a three-neck flask (100 mL) connected to a Schlenk line (all chemicals were used as received). Then the temperature was raised up to around 110 °C with stirring, for degassing about an hour and purging with Ar for 3 times. All reaction conditions were kept inert to prevent the formation of the oxide. Then, the flask was heated to 215 °C and kept for 1 h. The final yellow precipitant was dispersed in approximately 20 mL toluene to form a stable ink solution.

### **Synthesis of MoS<sub>2</sub> nanodots:**

163.1 mg Mo(acac)<sub>2</sub> [bis(acetylacetonato)dioxomolybdenum] (97%, Aladdin), 32 mg S (AR, Sinopharm Chemical Reagent) powder and 10 mL oleylamine (C-18 content 80%-90%, Aladdin) were added into a three-neck flask (100 mL) connected to a Schlenk line. Then the temperature was raised up to around 110°C with stirring, for degassing about an hour and purging with Ar for 3 times. All reaction conditions were kept inert to prevent the formation of the oxide. Then, the flask was heated to 300 °C and kept for 1 h. The final black precipitant was dispersed in approximately 20 mL toluene to form a stable ink solution.

### **Preparation for In<sub>2</sub>S<sub>3</sub>, MoS<sub>2</sub> and In<sub>2</sub>S<sub>3</sub>/MoS<sub>2</sub> nanocomposite films:**

In<sub>2</sub>S<sub>3</sub>, MoS<sub>2</sub> and In<sub>2</sub>S<sub>3</sub>/MoS<sub>2</sub> nanocomposite were dissolved in toluene solution. To prepare films for optical and photoelectrochemical tests, 0.2-0.3 mL solution of the materials was coated on soda-lime glass (SLG) and FTO glass, respectively. Then the samples were kept in the draught cupboard to naturally evaporate toluene.

## **Materials characterizations**

TEM images were obtained on a JEM-2100F field-emission transmission electron microscope with a working voltage of 200 kV. Raman spectra were obtained on a Jobin-YvonLabRamHR800-Horiba spectrometer with the wavelength of 532 nm. The optical absorption spectra were collected using a Hitachi U-4100 spectrophotometer. X-ray photoelectron spectroscopy (XPS) analysis was performed with the Spectrometer of Thermo-VG Scientific ESCALAB 250Xi. The photoelectrochemical characterization and EIS tests of the film were carried out in 0.2 M Na<sub>2</sub>S+Na<sub>2</sub>SO<sub>3</sub> solution in a Pyrex electrolytic cell. A 300 W xenon lamp was used as the light source, and the light intensity was kept at 40 mW/cm<sup>2</sup>. Mott-Schottky plots were obtained in 0.1 M Na<sub>2</sub>SO<sub>4</sub> solution without irradiation. The ICP test was performed using the Thermo Scientific iCAP 7000 series ICP Spectrometer.

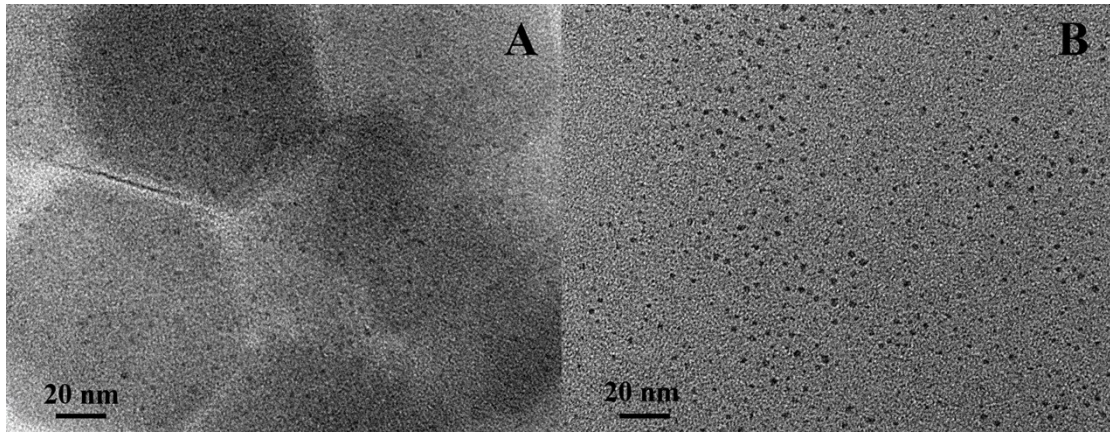

**Fig. S1** Additional TEM images of the obtained  $\text{In}_2\text{S}_3/\text{MoS}_2$  composite.

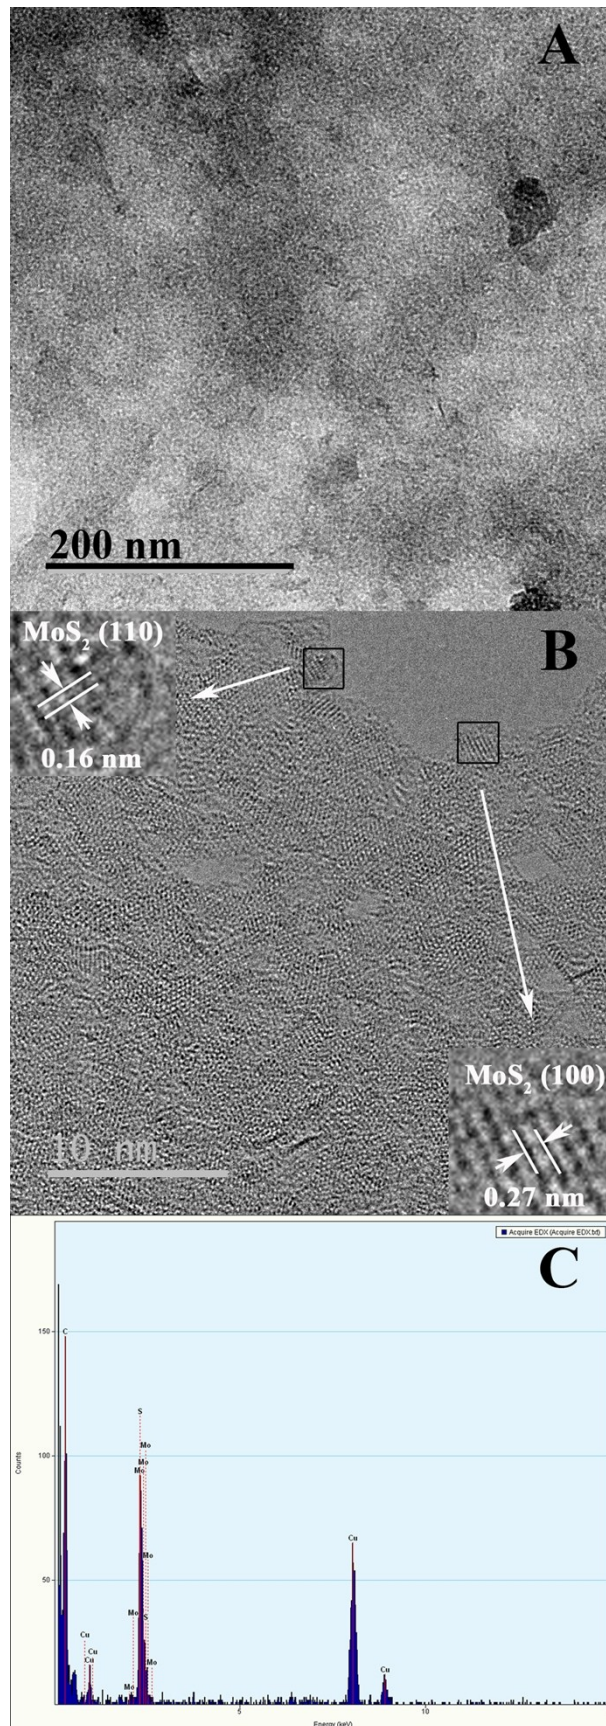

**Fig. S2** (A) TEM, (B) HR-TEM images and (C) EDS spectrum of MoS<sub>2</sub> nanodots.

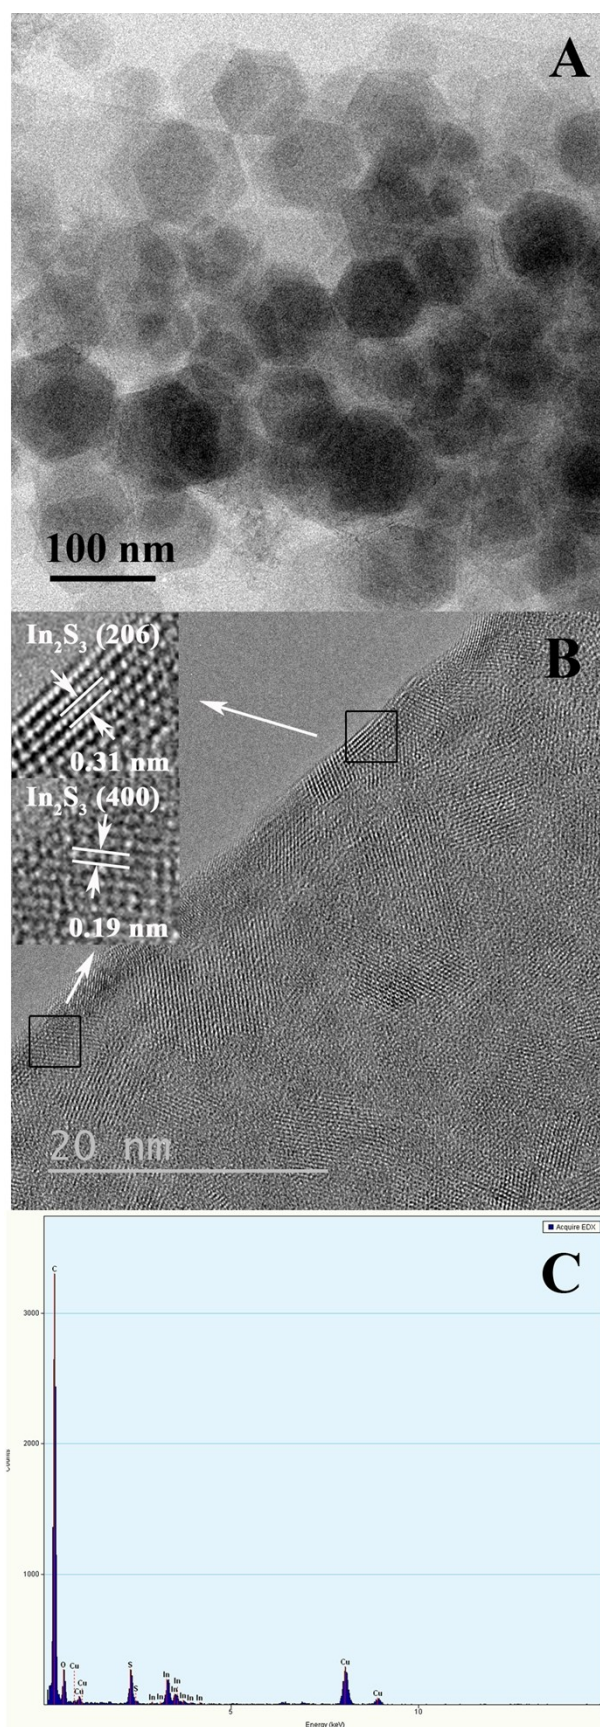

**Fig. S3** (A) TEM, (B) HR-TEM images and (C) EDS spectrum of  $\text{In}_2\text{S}_3$  nanoplates.

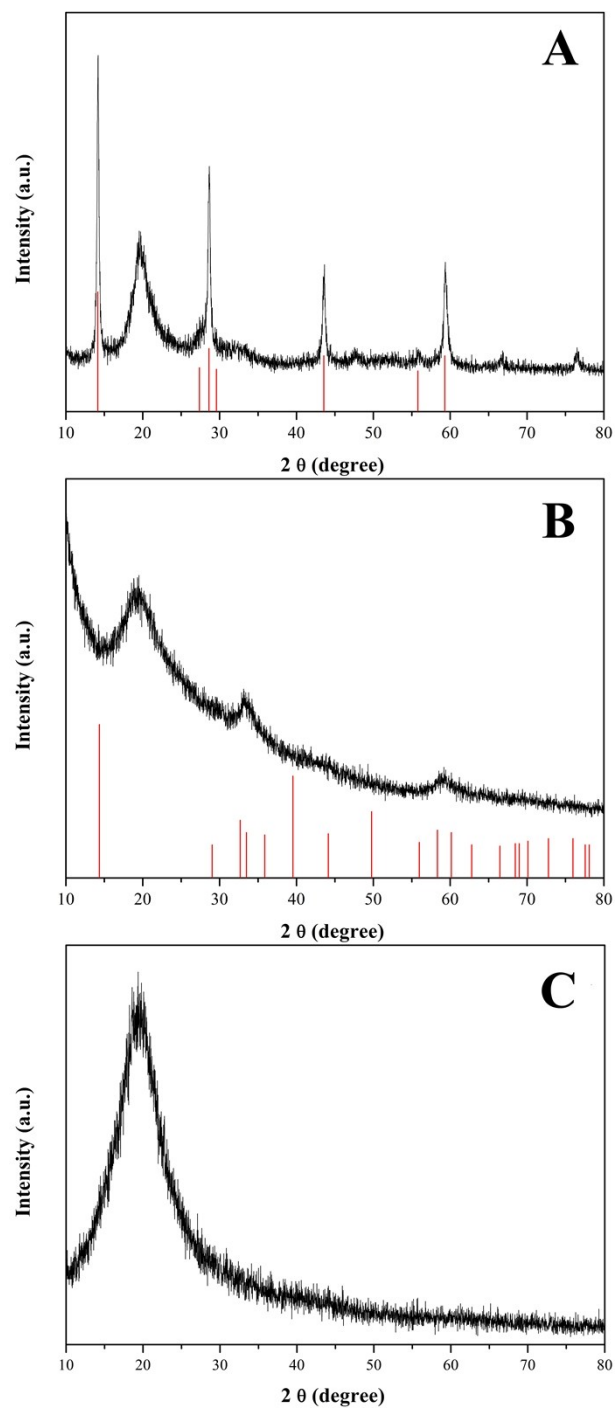

Fig. S4 XRD patterns of (A)  $\text{In}_2\text{S}_3$ , (B)  $\text{MoS}_2$  and (C) Oleylamine.

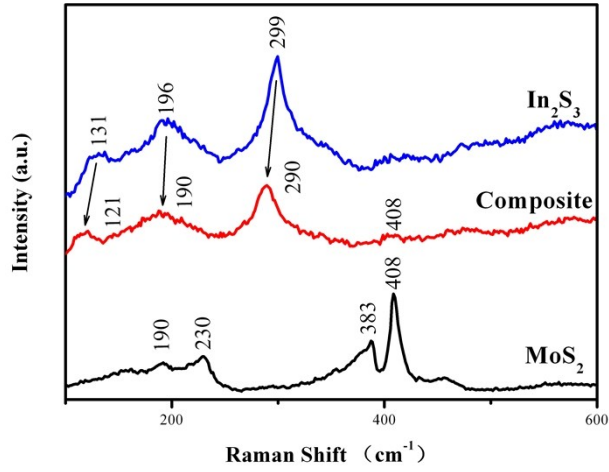

**Fig. S5** Raman spectra of  $\text{In}_2\text{S}_3$ ,  $\text{MoS}_2$  and  $\text{In}_2\text{S}_3/\text{MoS}_2$  nanocomposite.

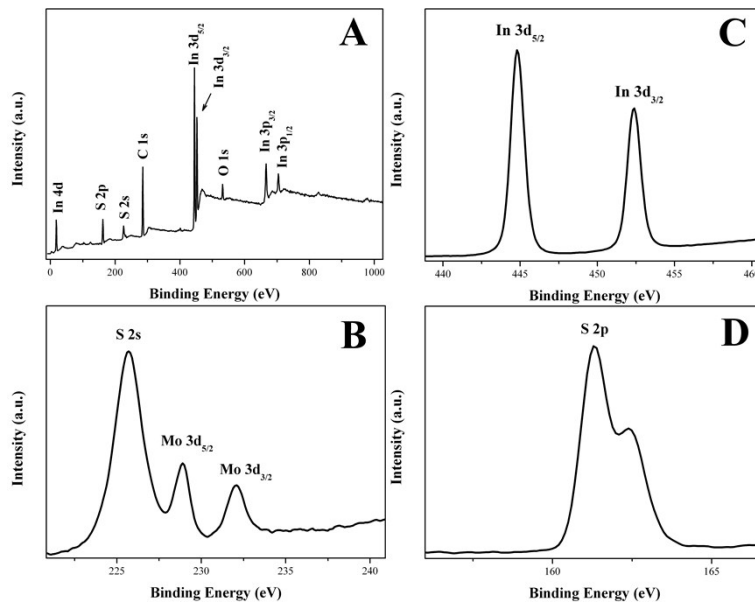

**Fig.S6** The XPS spectra of the  $\text{In}_2\text{S}_3/\text{MoS}_2$  nanocomposite: (A) Survey , (B) Mo 3d, (C) In 3d and (D) S 2p.

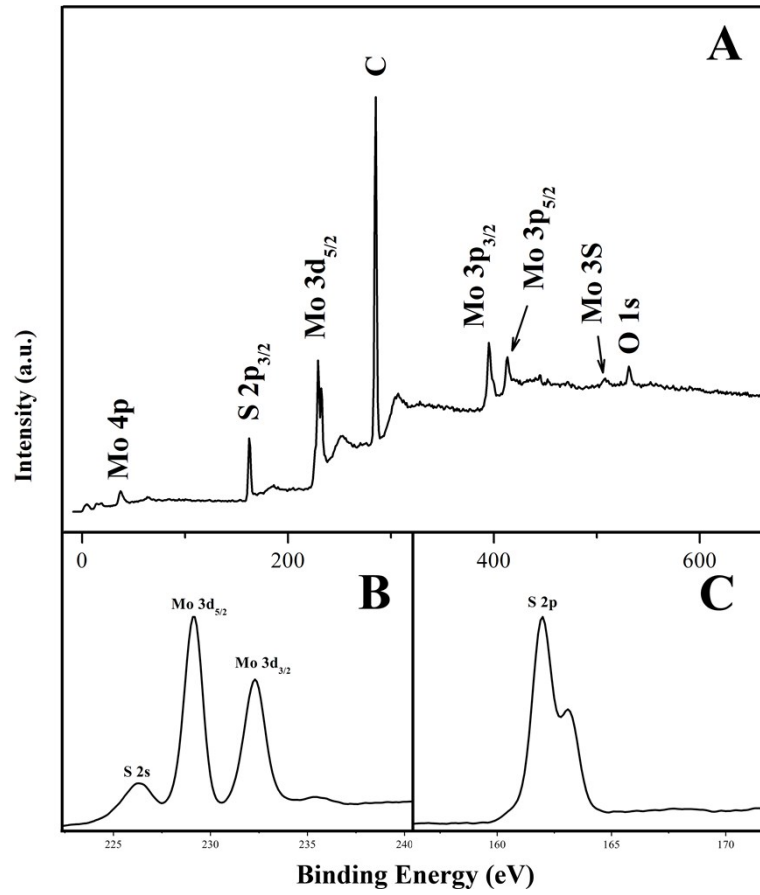

**Fig. S7** The XPS spectra of MoS<sub>2</sub> nanodots: (A) Survey, (B) Mo 3d and (C) S 2p.



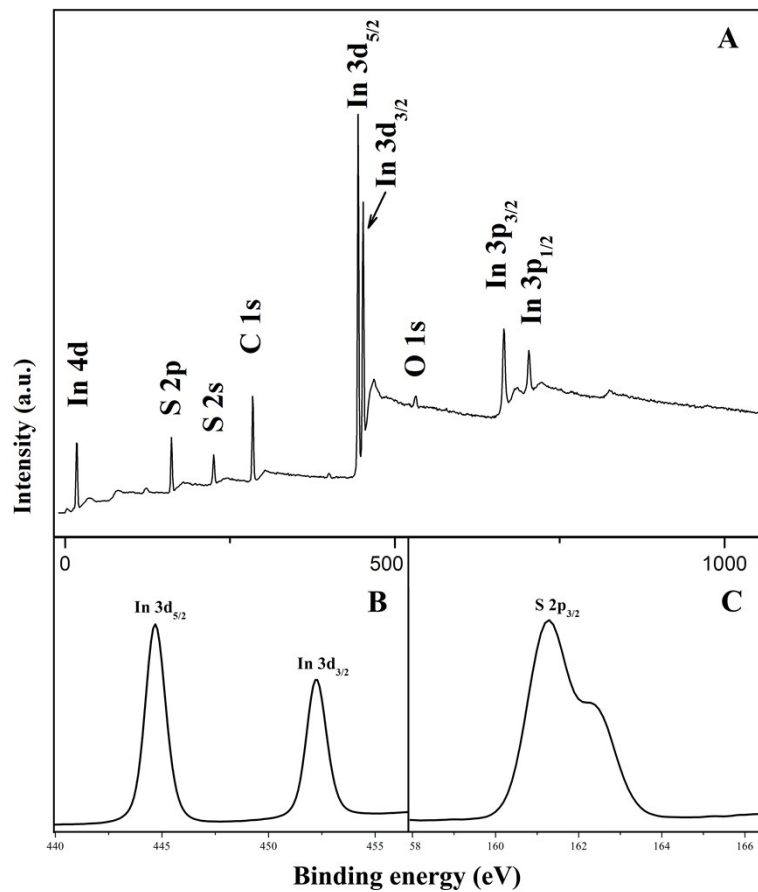

**Fig. S8** The XPS spectra of  $\text{In}_2\text{S}_3$  nanoplates: (A) Survey, (B) In 3d and (C) S 2p of  $\text{In}_2\text{S}_3$

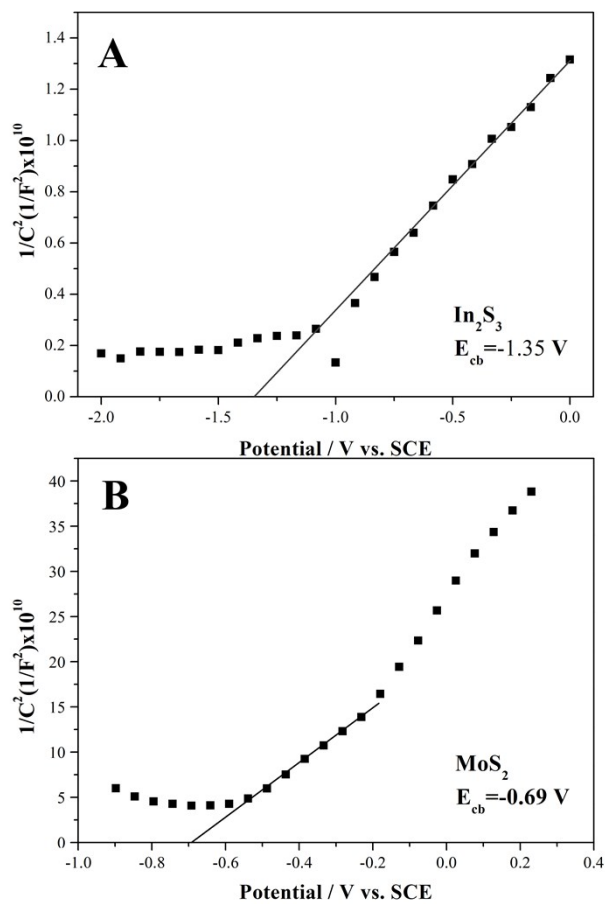

**Fig. S9** Mott-Schottky plots of (A)  $\text{In}_2\text{S}_3$  and (B)  $\text{MoS}_2$  in 0.1 M  $\text{Na}_2\text{SO}_4$  solution under the dark condition.

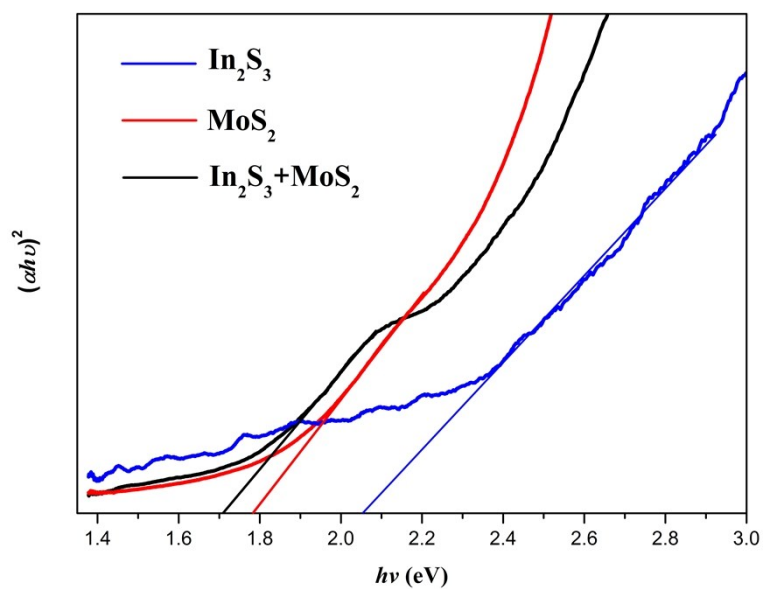

**Fig. S10** Band gap values of  $\text{In}_2\text{S}_3$ ,  $\text{MoS}_2$  and  $\text{In}_2\text{S}_3/\text{MoS}_2$  composite.
